# Supplementary material for: Crystal structure resolution of an insulator due to the cooperative Jahn–Teller effect through Bader's theory: the challenging case of cobaltite oxide Y114
Source: Royal Society of Chemistry journal article supplement (doi:10.1039/c8dt00073e), 2018-01-01
Supplement: c8dt00073e1.pdf [file c8dt00073e1.pdf]

## Electronic Supporting Information

for

# **Crystal Structure Resolution of an Insulator Due to Cooperative Jahn-Teller through Bader's Theory: The Challenging Case of Cobaltite Oxide Y114**

Christian Tantardini<sup>a</sup> and Enrico Benassi<sup>a,†</sup>

<sup>a</sup>*Novosibirsk State University, Pirogova 2, Novosibirsk 630090, Russian Federation*

<sup>b</sup>*School of Science and Technology, Nazarbayev University, 53 Kabanbay Batyr Ave., Astana 010000, Republic of Kazakhstan*

<sup>†</sup>*Corresponding author: [enrico.benassi@nu.edu.kz](mailto:enrico.benassi@nu.edu.kz), +7 (717)2706688.*

**E.S.I.1** (a) Scheme of Kagome lattice adapted from study of Owerre *et al.* (2015)<sup>[1]</sup> to LDA+U full optimized hexagonal structure of Y114 seen from **c** lattice view. There are two different cobalt atoms indicated with Co1 and Co2, which both present within experimental structure tetrahedral coordination of different dimension. The red hexagon denotes the Brillouin zone with  $\Gamma = (0, 0)$ ;  $K = (2\pi/3, 0)$ ;  $M = (\pi/2, \pi/2\sqrt{3})$ . (b) Scheme of geometrical relationship between triangular and adjacent Kagome lattice adapted from study of Soda *et al.* (2006)<sup>[2]</sup> to LDA+U full optimized hexagonal structure of Y114 seen from **b** lattice view; the susceptibility measurements attributed +3 to Co1 and +2 to Co2 with the impossibility to attribute spin order.

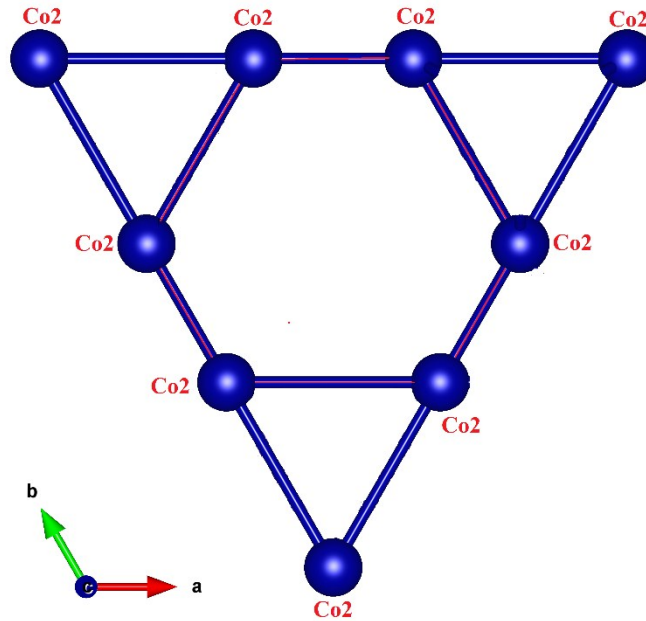

(a)

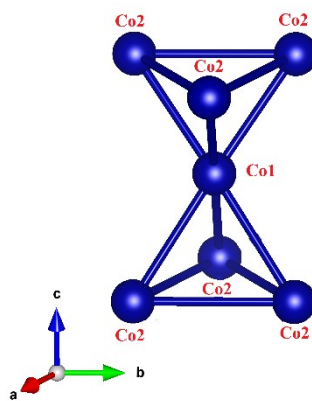

(b)

**E.S.I.2** Comparison between the Y114 hexagonal crystal structure as from the experimental data<sup>[3]</sup> (upper) and after LDA+U DFT full optimisation (lower). The bond distances are in Angstrom. Legend of colours: Cobalt (blue), Oxygen (red), Barium (green), Yttrium (grey).

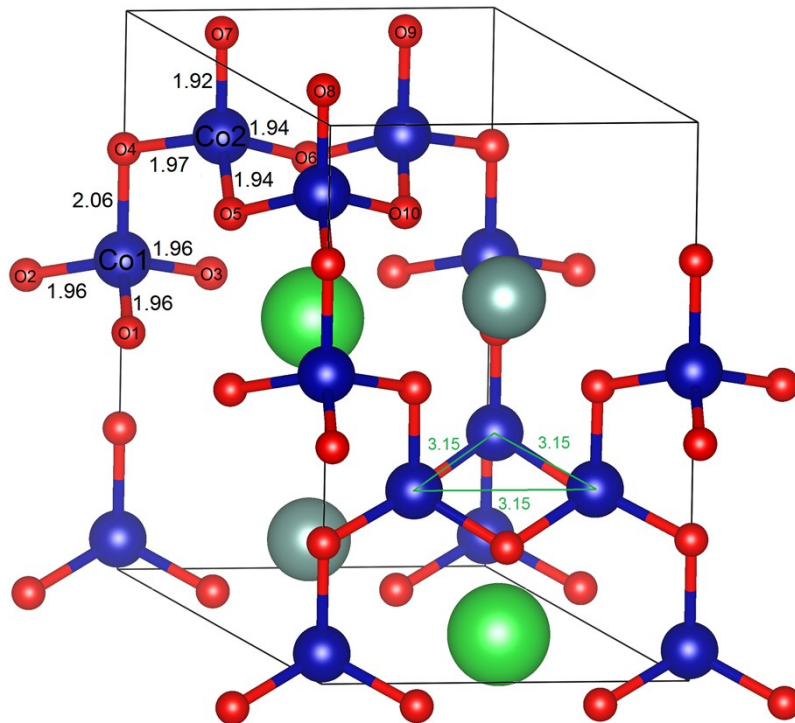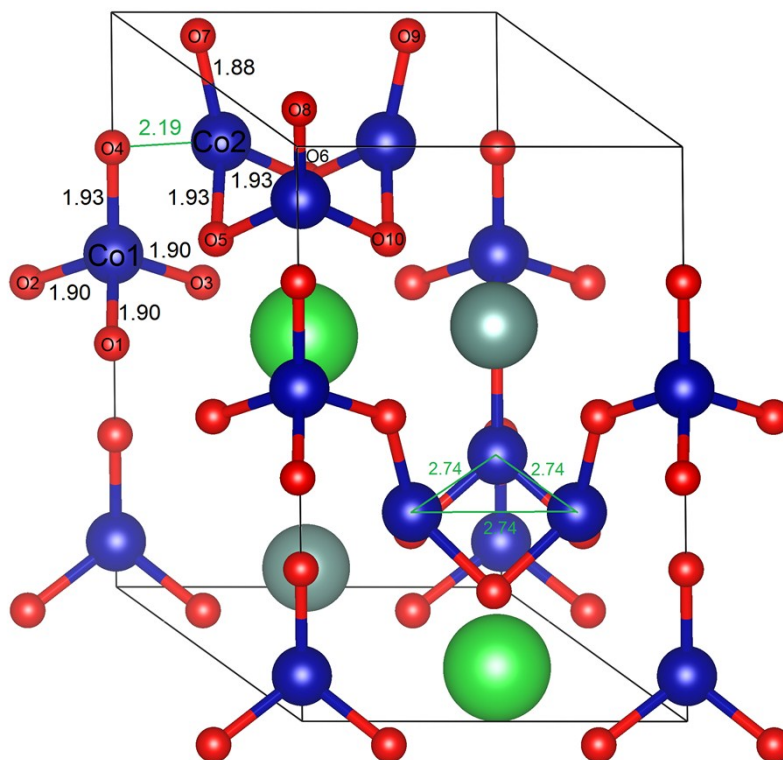

**E.S.I.3** Bond distances for Y114 optimized at LDA+U DFT approximation with different Hubbard energies.

| $E_{\text{Hub}} / eV$ | <b>Co1-O1</b> | <b>Co1-O2</b> | <b>Co1-O3</b> | <b>Co1-O4</b> | <b>Co2-O5</b> | <b>Co2-O6</b> | <b>Co2-O7</b> |
|-----------------------|---------------|---------------|---------------|---------------|---------------|---------------|---------------|
| <b>5</b>              | 1.8983        | 1.8983        | 1.8983        | 1.9344        | 1.9325        | 1.9325        | 1.8752        |
| <b>8</b>              | 1.8985        | 1.8985        | 1.8985        | 1.9344        | 1.9322        | 1.9322        | 1.8753        |
| <b>9</b>              | 1.8985        | 1.8985        | 1.8985        | 1.9344        | 1.9322        | 1.9322        | 1.8753        |
| <b>10</b>             | 1.8985        | 1.8985        | 1.8985        | 1.9344        | 1.9322        | 1.9322        | 1.8753        |

**E.S.I.4** Bond angles for Y114 optimized at LDA+U DFT approximation with different Hubbard energies.

| $E_{\text{Hub}} / eV$ | <b>O1-Co1-<br/>O2</b> | <b>O1-Co1-<br/>O3</b> | <b>O1-Co1-<br/>O4</b> | <b>O2-Co1-<br/>O3</b> | <b>O2-Co1-<br/>O4</b> | <b>O3-Co1-<br/>O4</b> | <b>O5-Co2-<br/>O6</b> | <b>O5-Co2-<br/>O7</b> | <b>O6-Co2-<br/>O7</b> |
|-----------------------|-----------------------|-----------------------|-----------------------|-----------------------|-----------------------|-----------------------|-----------------------|-----------------------|-----------------------|
| <b>5</b>              | 100.1791              | 100.1790              | 117.6609              | 100.1790              | 117.6609              | 117.6609              | 95.4961               | 128.4969              | 128.4975              |
| <b>8</b>              | 100.2128              | 100.1447              | 117.6628              | 100.1746              | 117.6628              | 117.6628              | 95.5203               | 128.4939              | 128.5036              |
| <b>9</b>              | 100.1431              | 100.1961              | 117.6757              | 100.1930              | 117.6757              | 117.6757              | 95.5203               | 128.5120              | 128.5033              |
| <b>10</b>             | 100.2073              | 100.1877              | 117.6628              | 100.1446              | 117.6628              | 117.6628              | 95.5202               | 128.4941              | 128.5034              |

**E.S.I.5** Bond distances for Y114 and the substituted structures, optimized at LDA+U DFT approximation and according the standard LDA DFT method, respectively. For Y114 the experimental data<sup>[3]</sup> are also reported.

| Bond distance (Å) | Y114                       |                           | CA                         | ZC                         | ZA                         |
|-------------------|----------------------------|---------------------------|----------------------------|----------------------------|----------------------------|
| M1 =              | Co1(Co <sup>3+</sup> )     |                           | Al(Al <sup>3+</sup> )      | Co1(Co <sup>3+</sup> )     | Al(Al <sup>3+</sup> )      |
| M2 =              | Co2(Co <sup>2+</sup> )     |                           | Co2(Co <sup>2+</sup> )     | Zn(Zn <sup>2+</sup> )      | Zn(Zn <sup>2+</sup> )      |
|                   | <i>exp.</i> <sup>[3]</sup> | <i>comp.</i> <sup>*</sup> | <i>comp.</i> <sup>**</sup> | <i>comp.</i> <sup>**</sup> | <i>comp.</i> <sup>**</sup> |
| <b>M1-O1</b>      | 1.9558                     | 1.8983                    | 1.8053                     | 1.8432                     | 1.7866                     |
| <b>M1-O2</b>      | 1.9558                     | 1.8983                    | 1.8195                     | 1.8695                     | 1.7866                     |
| <b>M1-O3</b>      | 1.9558                     | 1.8983                    | 1.7808                     | 1.8695                     | 1.7866                     |
| <b>M1-O4</b>      | 2.0642                     | 1.9344                    | 1.8357                     | 1.9168                     | 1.7965                     |
| <b>M2-O5</b>      | 1.9366                     | 1.9325                    | 1.8257                     | 1.9789                     | 1.9621                     |
| <b>M2-O6</b>      | 1.9366                     | 1.9325                    | 1.8372                     | 1.9789                     | 1.9621                     |
| <b>M2-O7</b>      | 1.9194                     | 1.8752                    | 2.0082                     | 2.0483                     | 2.0473                     |

\* LDA+U (PAW) DFT

\*\* LDA (PAW) DFT

**E.S.I.6** Bond angles for Y114 and the substituted structures, optimized at LDA+U DFT approximation and according the standard LDA DFT method, respectively. For Y114 the experimental data<sup>[3]</sup> are also reported.

| Bond Angle      | Y114                       |                           | CA                         | ZC                         | ZA                         |
|-----------------|----------------------------|---------------------------|----------------------------|----------------------------|----------------------------|
| M1 =            | Co1(Co <sup>3+</sup> )     |                           | Al(Al <sup>3+</sup> )      | Co1(Co <sup>3+</sup> )     | Al(Al <sup>3+</sup> )      |
| M2 =            | Co2(Co <sup>2+</sup> )     |                           | Co2(Co <sup>2+</sup> )     | Zn(Zn <sup>2+</sup> )      | Zn(Zn <sup>2+</sup> )      |
|                 | <i>exp.</i> <sup>[3]</sup> | <i>comp.</i> <sup>*</sup> | <i>comp.</i> <sup>**</sup> | <i>comp.</i> <sup>**</sup> | <i>comp.</i> <sup>**</sup> |
| <b>O1-M1-O2</b> | 110.0378                   | 100.1791                  | 109.8638                   | 99.8038                    | 110.8137                   |
| <b>O1-M1-O3</b> | 110.0379                   | 100.1790                  | 114.0992                   | 115.1270                   | 110.8041                   |
| <b>O1-M1-O4</b> | 108.8985                   | 117.6609                  | 110.8468                   | 107.3022                   | 108.1160                   |
| <b>O2-M1-O3</b> | 110.0378                   | 100.1790                  | 107.9586                   | 122.8699                   | 110.7886                   |
| <b>O2-M1-O4</b> | 108.8985                   | 117.6609                  | 104.8740                   | 108.7392                   | 108.1056                   |
| <b>O3-M1-O4</b> | 108.8985                   | 117.6609                  | 108.7528                   | 102.3166                   | 108.0957                   |
| <b>O5-M2-O6</b> | 102.9688                   | 95.4961                   | 146.3278                   | 112.9289                   | 119.7858                   |
| <b>O5-M2-O7</b> | 113.2331                   | 128.4969                  | 106.1294                   | 112.8891                   | 107.3178                   |
| <b>O6-M2-O7</b> | 113.2333                   | 128.4975                  | 106.8129                   | 107.6850                   | 107.2011                   |
| <b>O4-M2-O7</b> | 106.8699                   | 91.8521                   | 95.4783                    | 107.9351                   | 108.8004                   |

\* LDA+U (PAW) DFT

\*\* LDA (PAW) DFT

**E.S.I.7** Atomic basin volumes and charges<sup>[4]</sup> for the fully optimized structures of Y114 and the substituted structures.

|                   | Y114*                        |              | CA**                         |              | ZC**                         |              | ZA**                         |              |
|-------------------|------------------------------|--------------|------------------------------|--------------|------------------------------|--------------|------------------------------|--------------|
| M1 =              | Co1(Co <sup>3+</sup> )       |              | Al(Al <sup>3+</sup> )        |              | Co1(Co <sup>3+</sup> )       |              | Al(Al <sup>3+</sup> )        |              |
| M2 =              | Co2(Co <sup>2+</sup> )       |              | Co2(Co <sup>2+</sup> )       |              | Zn(Zn <sup>2+</sup> )        |              | Zn(Zn <sup>2+</sup> )        |              |
| SCF ( <i>eV</i> ) | -45121.20                    |              | -41822.63                    |              | -42790.70                    |              | -39468.13                    |              |
| ATOM              | Volume                       | Charge       | Volume                       | Charge       | Volume                       | Charge       | Volume                       | Charge       |
|                   | ( <i>bohr</i> <sup>3</sup> ) | ( <i>e</i> ) | ( <i>bohr</i> <sup>3</sup> ) | ( <i>e</i> ) | ( <i>bohr</i> <sup>3</sup> ) | ( <i>e</i> ) | ( <i>bohr</i> <sup>3</sup> ) | ( <i>e</i> ) |
| <b>Co1</b>        | 75.10                        | 0.50         | -                            | -            | 67.16                        | 1.40         | -                            | -            |
| <b>Co2</b>        | 78.13                        | 0.30         | 76.48                        | 1.15         | -                            | -            | -                            | -            |
| <b>Al1</b>        | -                            | -            | 3.44                         | 2.92         | -                            | -            | 3.43                         | 2.92         |
| <b>Zn2</b>        | -                            | -            | -                            | -            | 75.53                        | 1.23         | 76.35                        | 1.22         |
| <b>O1</b>         | 94.99                        | -1.96        | 121.09                       | -1.61        | 97.26                        | -1.22        | 117.13                       | -1.62        |
| <b>O2</b>         | 94.99                        | -1.96        | 118.44                       | -1.59        | 104.57                       | -1.24        | 117.14                       | -1.62        |
| <b>O3</b>         | 94.99                        | -1.96        | 112.38                       | -1.56        | 104.57                       | -1.24        | 117.14                       | -1.62        |
| <b>O4</b>         | 92.42                        | -1.85        | 108.91                       | -1.44        | 87.29                        | -1.20        | 98.95                        | -1.54        |
| <b>O5</b>         | 96.17                        | -1.95        | 90.40                        | -1.22        | 99.13                        | -1.31        | 99.97                        | -1.32        |
| <b>O6</b>         | 96.17                        | -1.95        | 93.44                        | -1.20        | 100.54                       | -1.32        | 99.97                        | -1.32        |
| <b>O7</b>         | 94.99                        | -1.96        | 118.48                       | -1.59        | 97.27                        | -1.22        | 117.15                       | -1.62        |

\* LDA+U (PAW) DFT

\*\* LDA (PAW) DFT

**E.S.I.8** Plot of the DOS for the fully optimized structures of Y114 (black) and the substituted structures: CA (red), ZA (turquoise), and ZC (green). Please note that the same scales on the two axes were used to ease comparisons.

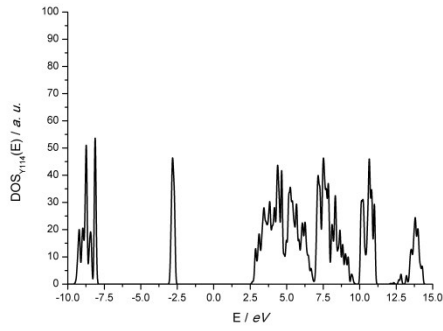

Y114\*

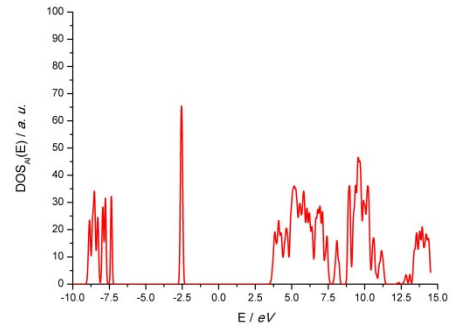

CA\*\*

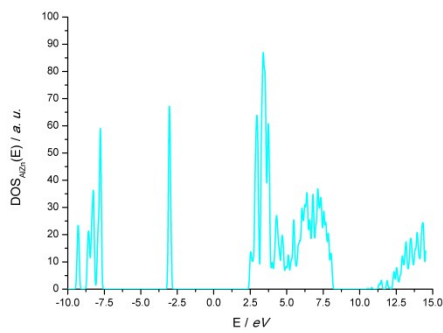

ZA\*\*

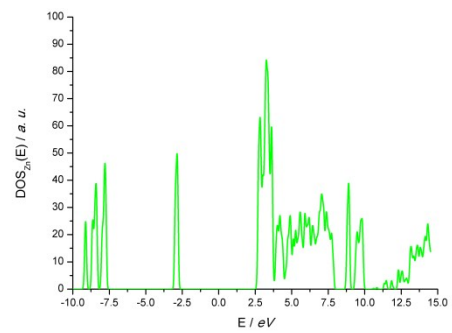

ZC\*\*

\* LDA+U (PAW) DFT

\*\* LDA (PAW) DFT



**E.S.I.9** Plots of *d*-PDOS for Co1 (black) and Co2 (red) atomic species into the full optimised crystal structure through LDA+U DFT calculation.

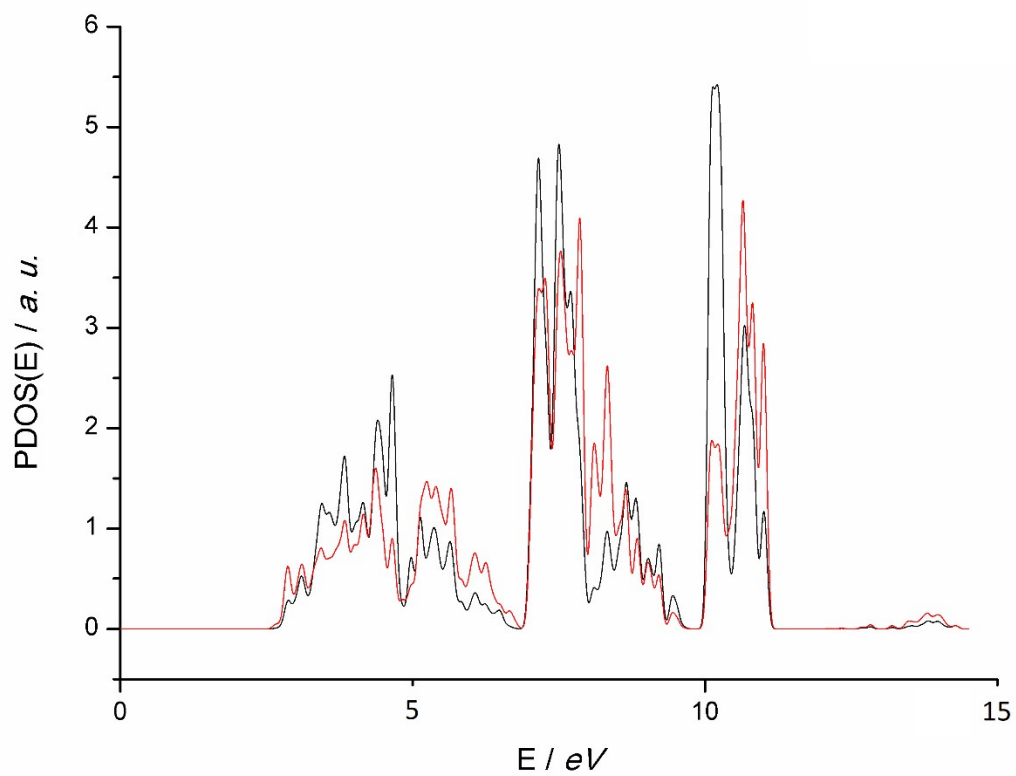

## REFERENCES

1. S. A. Owerre, A. A. Burkov, R. G. Melko *Phys. Rev. B* 2016, **93**, 144402-144407.
2. M. Soda, Y. Yasui, T. Moyoshi, M. Sato, N. Igawa, K. Kakurai *J. Phys. Soc. Jap.*, 2006, **75**, 5, 054707-054713.
3. M. Valldor, M. Andersson *Sol. St. Sciences* 2002, **4**, 923–931.
4. M. Yu, D. Trinkle, *J. Chem. Phys.*, 2011, **134**, 064111
